# Supplementary material for: Electrochemical and electronic properties of flower-like MoS2 nanostructures in aqueous and ionic liquid media
Source: Royal Society of Chemistry journal article supplement (doi:10.1039/c5ra09282e), 2015-01-01
Supplement: c5ra09282e1.pdf [file c5ra09282e1.pdf]

**Electronic Supplementary Information**

***Electrochemical and Electronic Properties of  
flower like MoS<sub>2</sub> nanostructures in aqueous and  
ionic liquid medium***

*Kavita Pandey, Pankaj Yadav, Indrajit Mukhopadhyay\**

School of Solar Energy, Pandit Deendayal Petroleum University, Gandhinagar- 382007, Gujarat,  
India

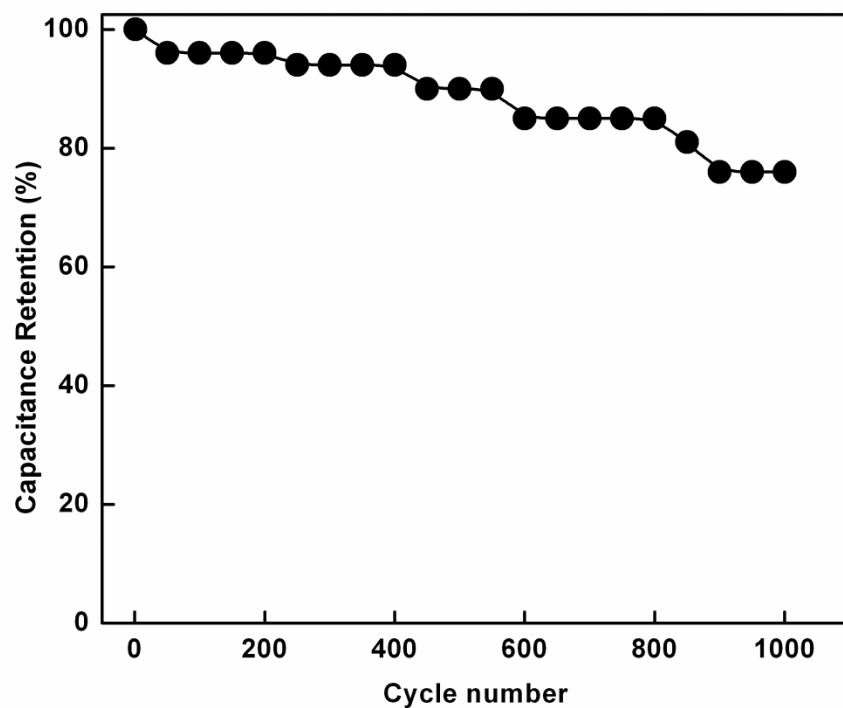

**Figure S1.** Variation of the specific capacitance of MoS<sub>2</sub> electrode as a function of cycle number measured at 50 mVs<sup>-1</sup> in aqueous solution.

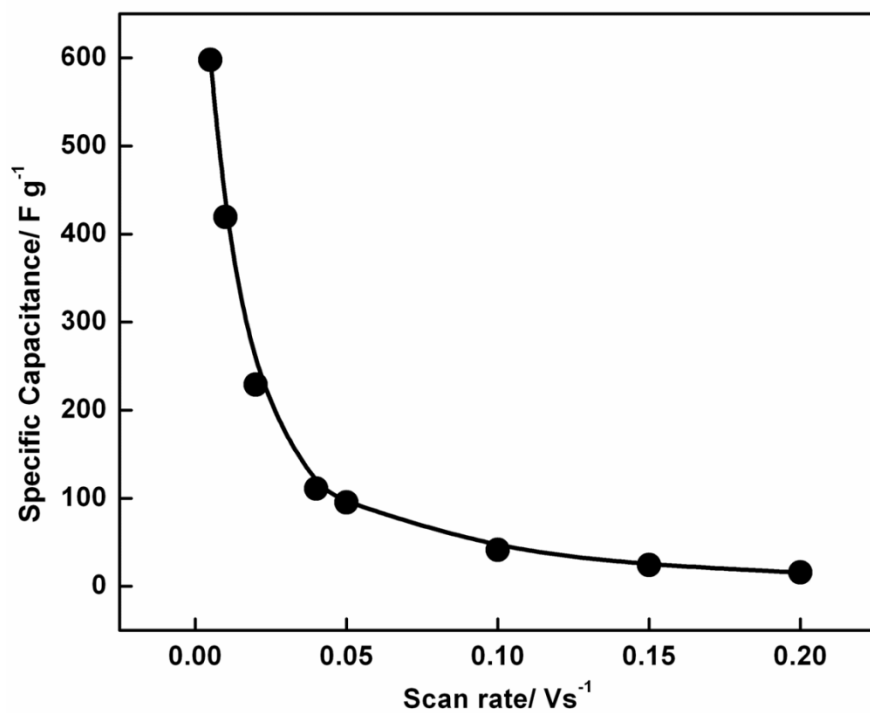

**Figure S2.** Variation of specific capacitance as a function of scan rate for MoS<sub>2</sub> electrode in IL medium

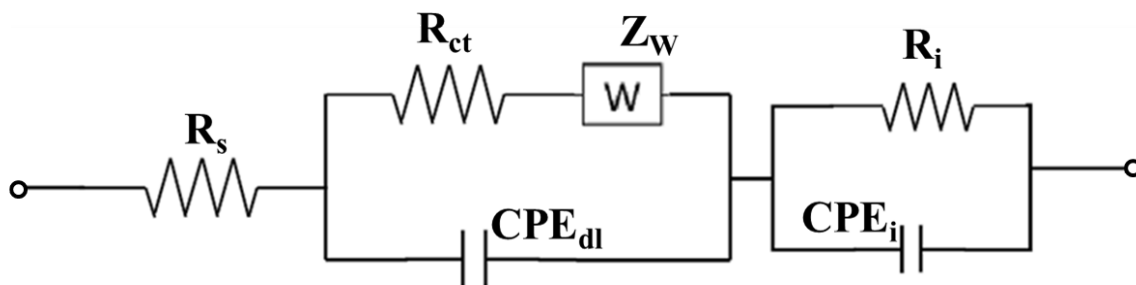

**Figure S3.** Electrical equivalent circuit employed to fit the impedance spectra obtained for MoS<sub>2</sub> electrodes in aqueous and ionic liquid medium at open circuit potential.
